# Supplementary material
Source: PubMed Central journal article supplement (PMC4811353)

Sup. Figure 1

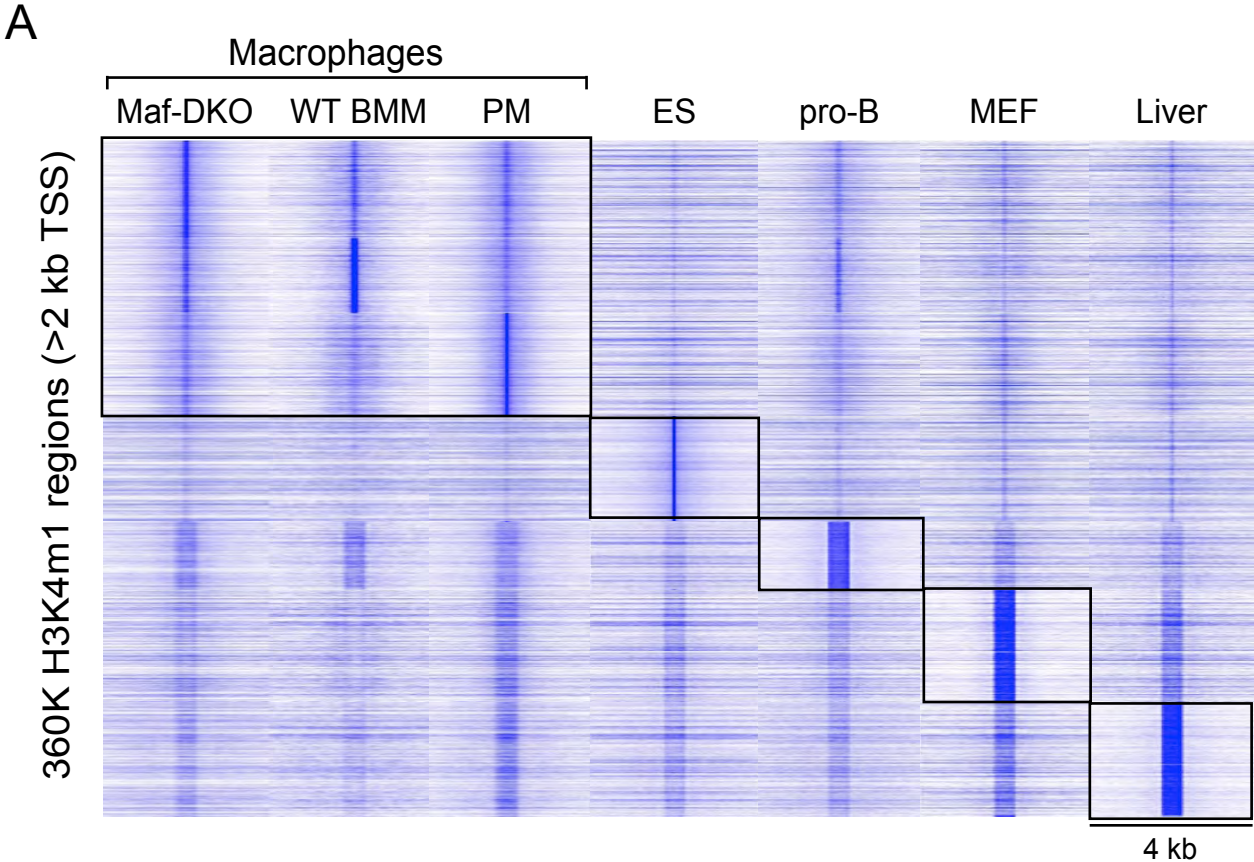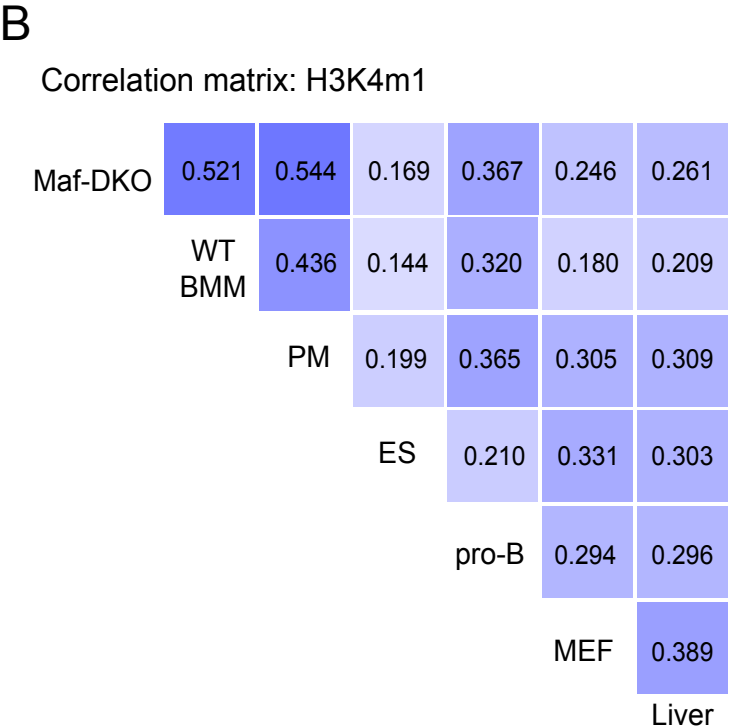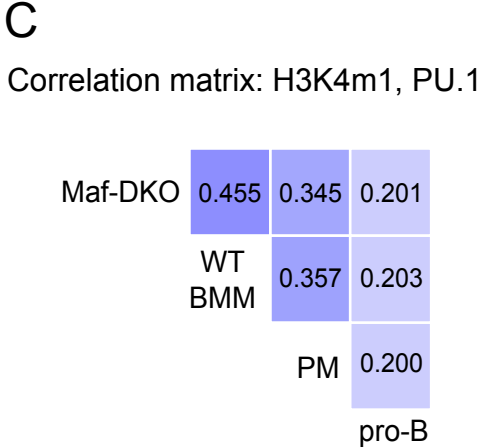

# Sup Figure 2

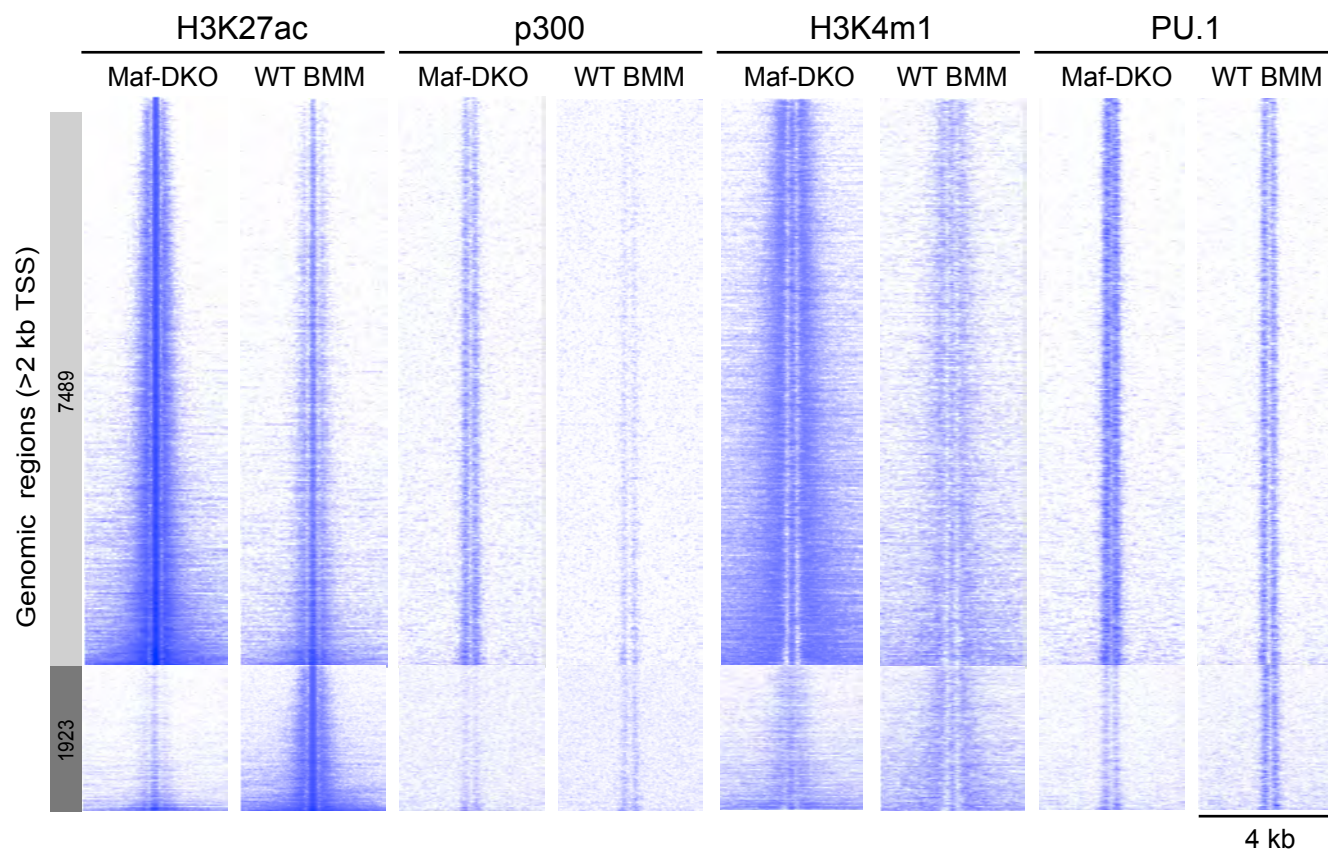

# Sup. Figure 3

**A**

| Motif | -logP value | %target/<br>%bkgd | Best match |
|-------|-------------|-------------------|------------|
|       | 6444        | 53/8.3            | PU.1       |
|       | 6029        | 66/16             | ETS1       |
|       | 4563        | 68/22             | PU.1-IRF   |
|       | 4020        | 58/18             | RUNX1      |
|       | 3774        | 44/10             | ATF3       |
|       | 3772        | 47/11             | AP-1       |
|       | 3154        | 40/9.4            | CEBP       |
|       | 2740        | 41/12             | CEBP:AP1   |
|       | 2652        | 47/16             | KLF5       |
|       | 2640        | 22/3.1            | JUN-AP1    |
|       | 2505        | 42/13             | MAFA       |
|       | 1181        | 16/3.5            | MAFK       |
|       | 1072        | 16/3.9            | MAFF       |

**B**

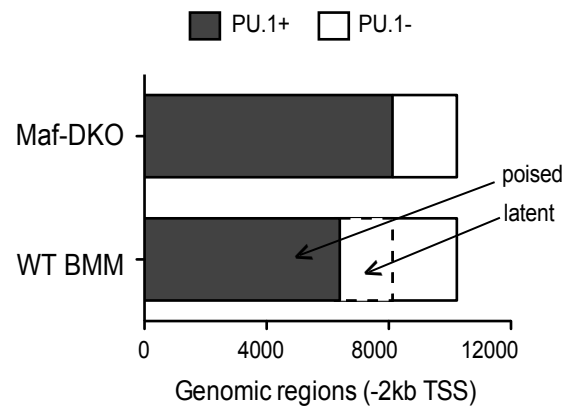

**C**

## GO Biological process

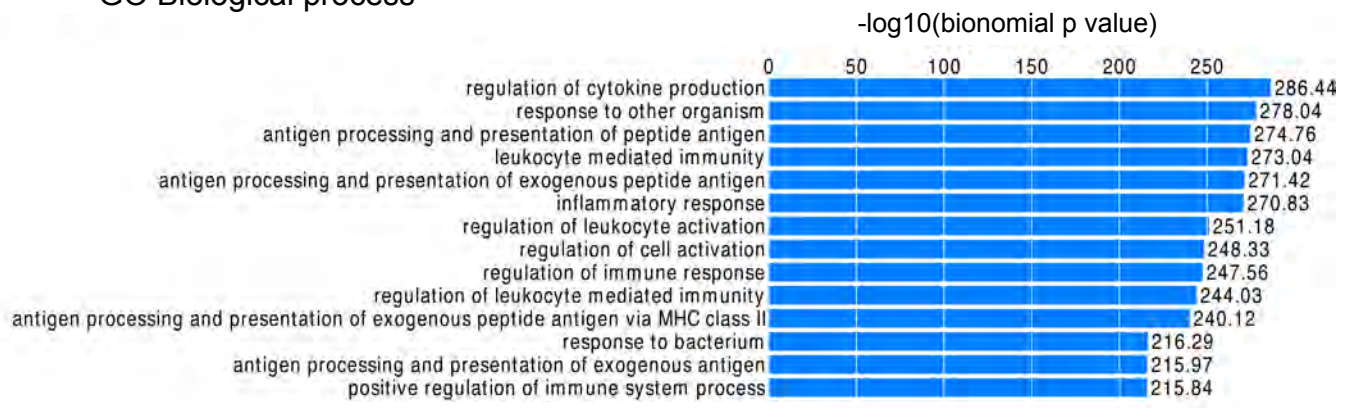

# Sup. Figure 4

## A

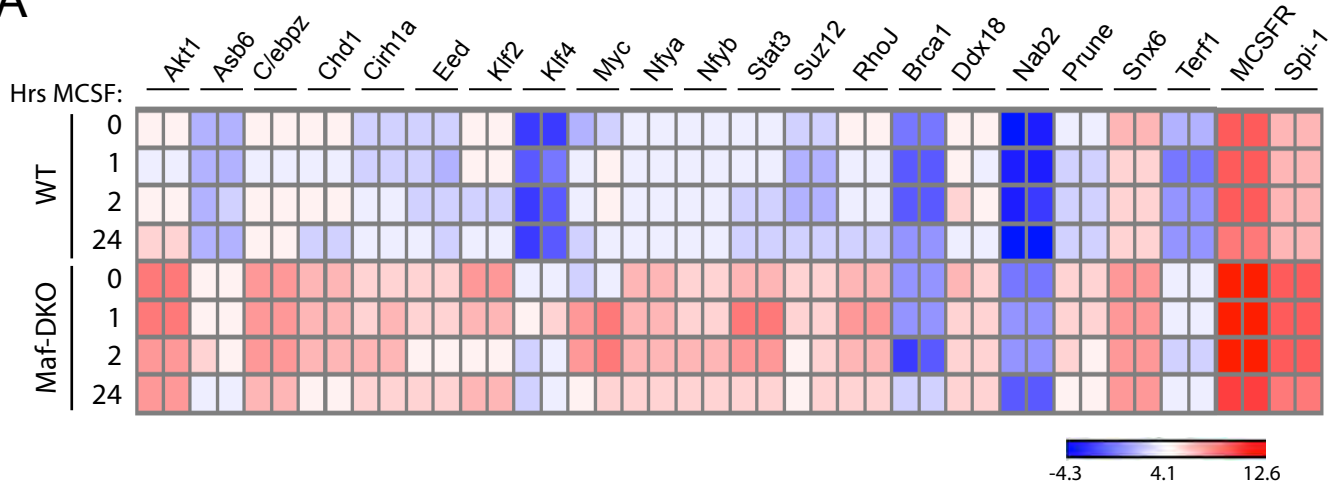

## B

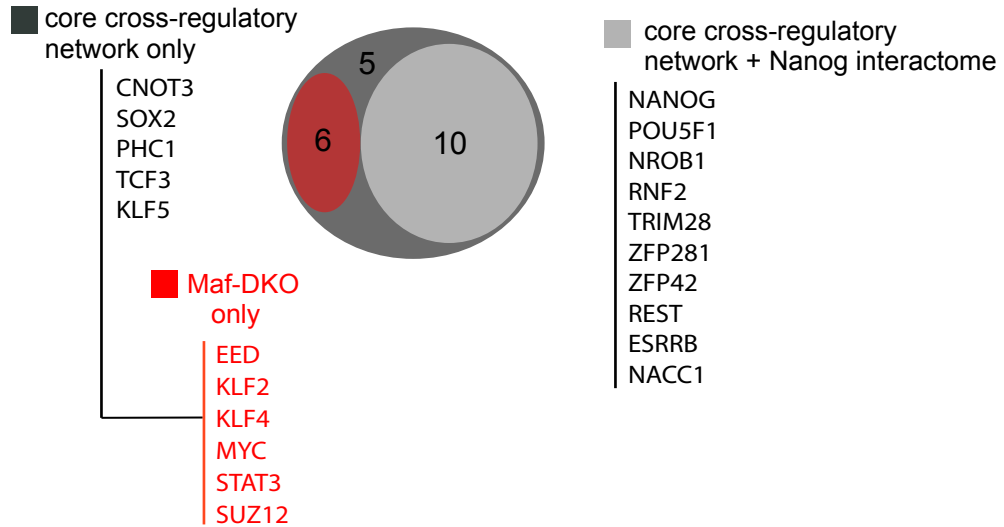

Based on:

• Macarthur, et al., Nat Rev MolCell Bio 2009

Sup. Figure 5

A

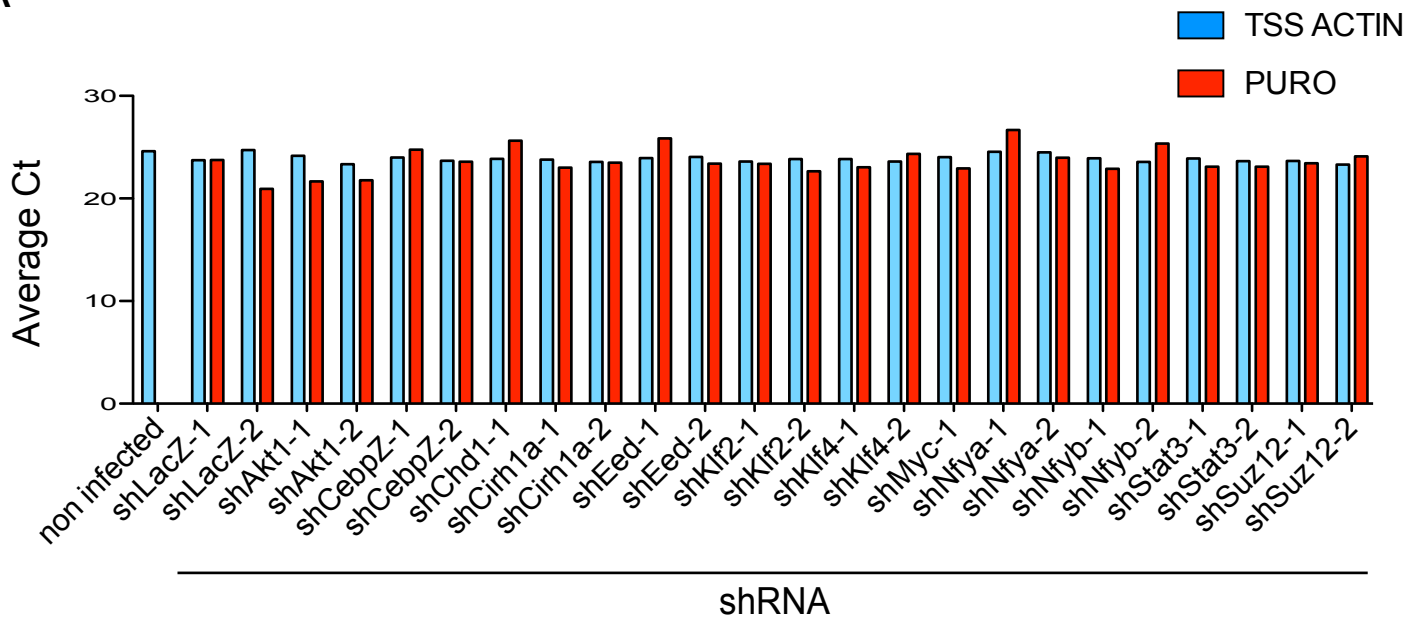

B

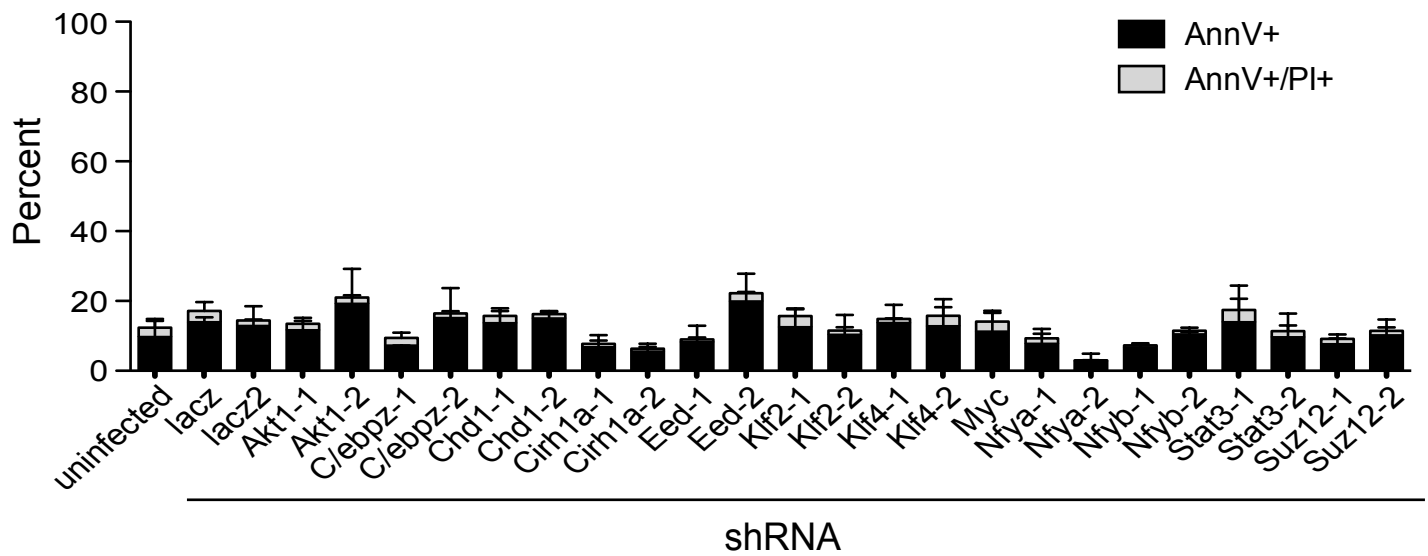

# Sup. Figure 6

**A**

**OCT4/POU5F1** chr17: 35,609,697-35,650,717

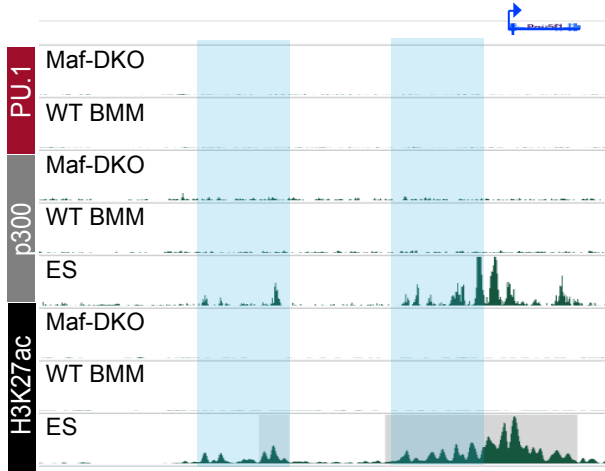

**SOX2** chr3: 34,416,026-34,703,656

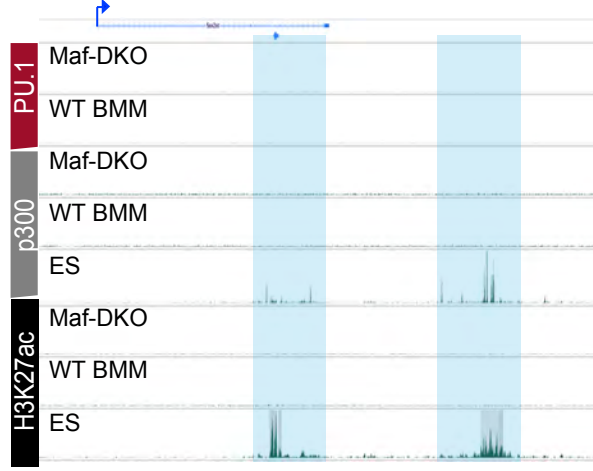

**NANOG** chr6: 122,609,946-122,670,973

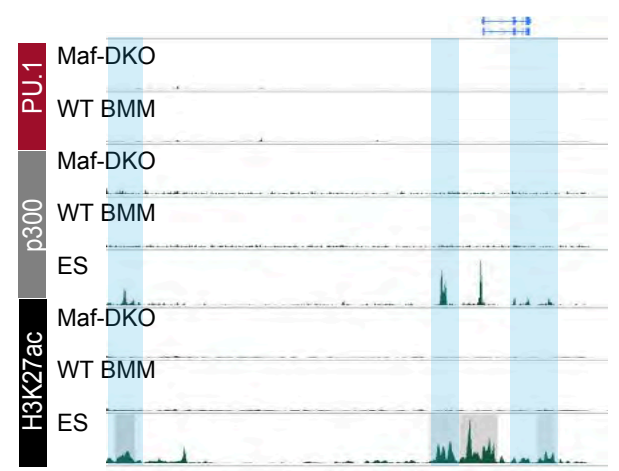

**B**

**NFYB** chr10: 82,190,757-82,288,668

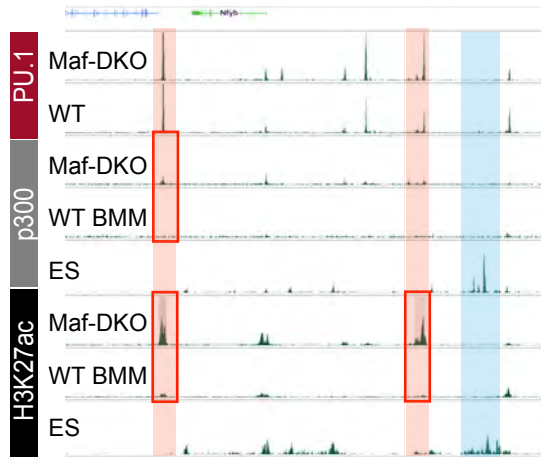

**SUZ12** chr11: 79,737,809-79,968,360

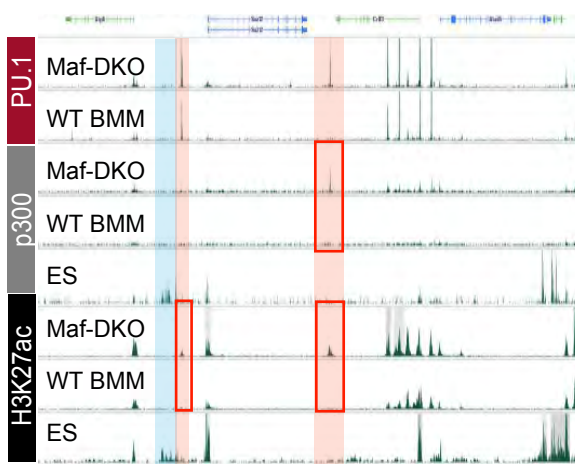

**DPPA3** chr6: 122,566,864-122,622,527

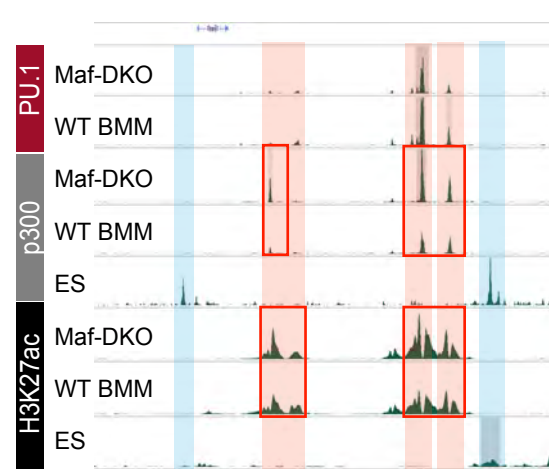

# Sup. Figure 7

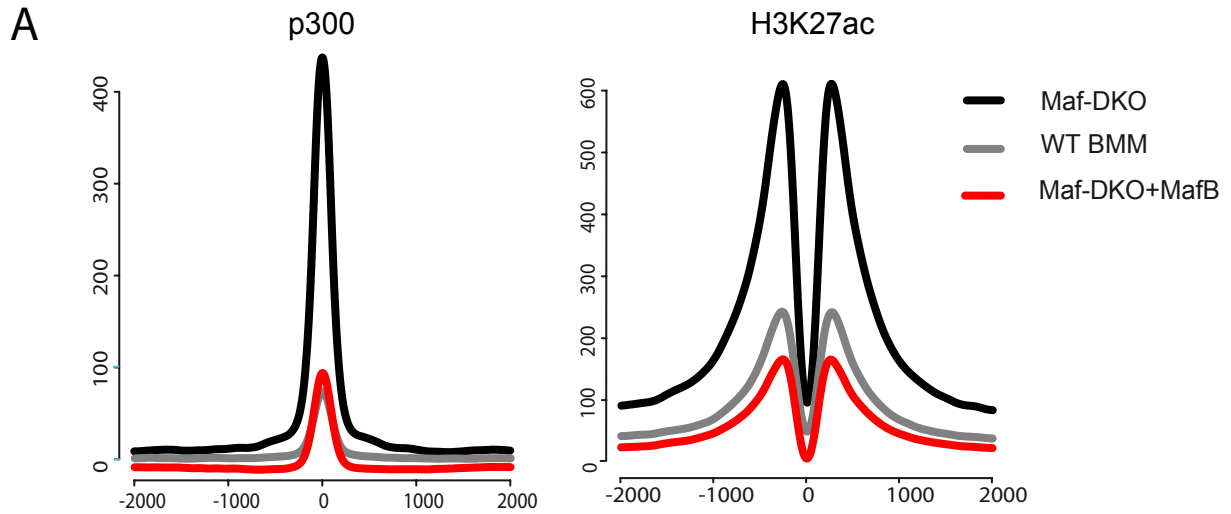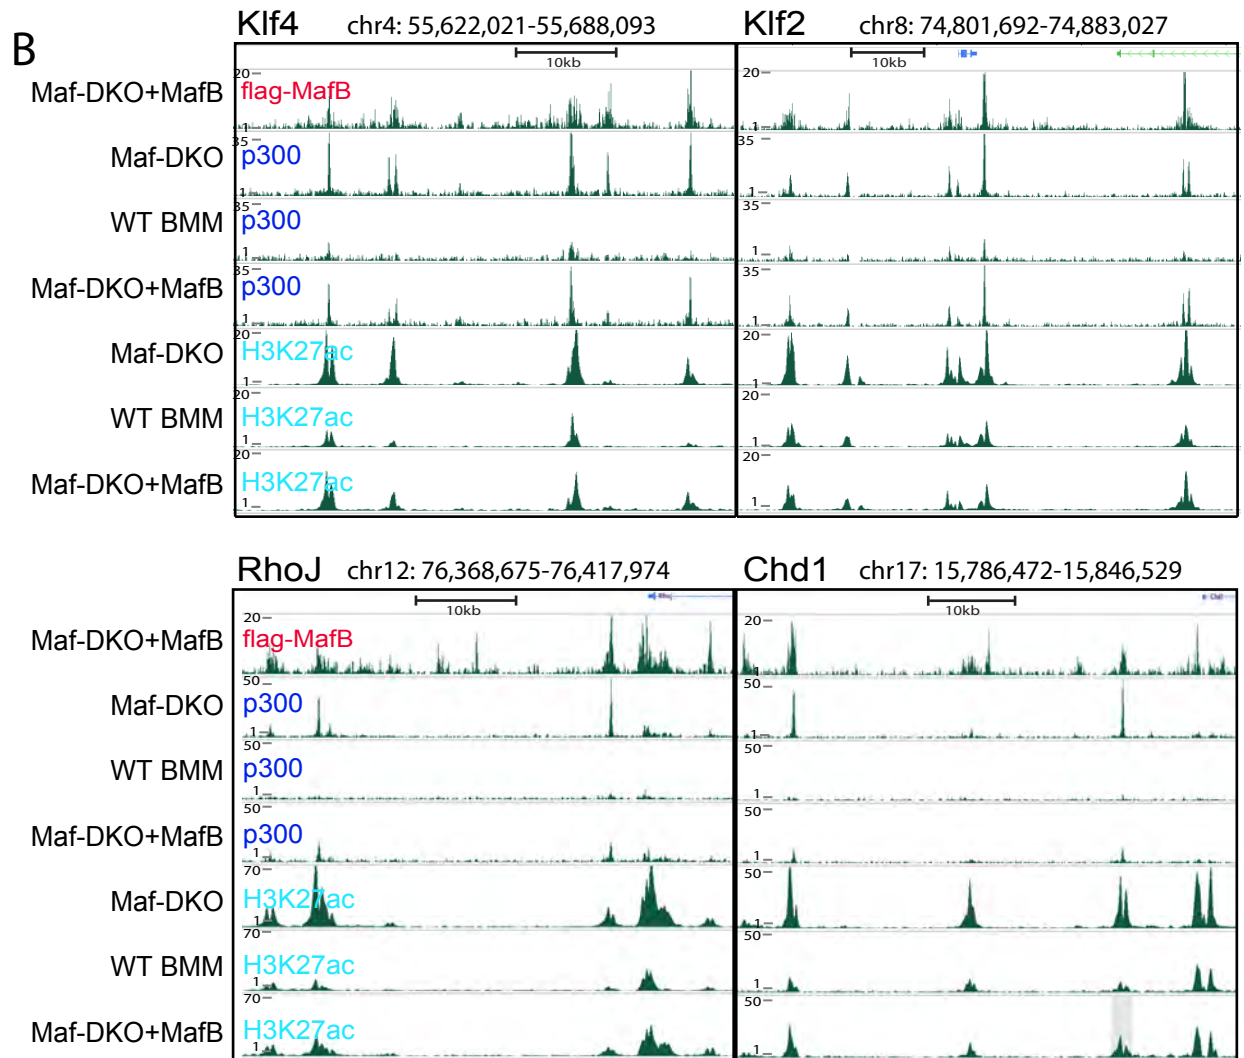

## Sup. Figure 8

| Motif                                                                             | -logP value | %target/<br>%bkgd | Best match |
|-----------------------------------------------------------------------------------|-------------|-------------------|------------|
|  | 45.9        | 62/16             | ETS1       |
|  | 41.6        | 46/8.2            | PU.1       |
|  | 31.9        | 63/23             | PU.1-IRF   |
|  | 28.2        | 46/13             | CEBP:AP1   |
|  | 27.7        | 53/18             | RUNX1      |
|  | 26.1        | 41/11             | CEBP       |
|  | 8.2         | 27/12             | MAFA       |



# Sup. Figure 9

**A**

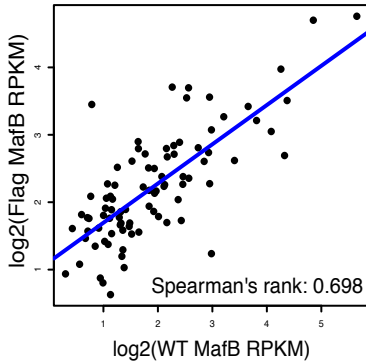

**B**

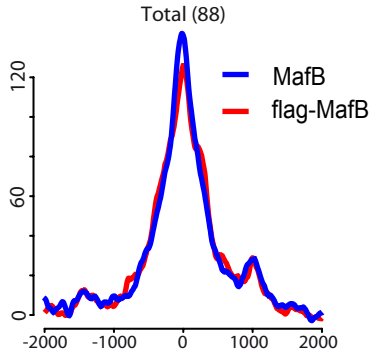

**C**

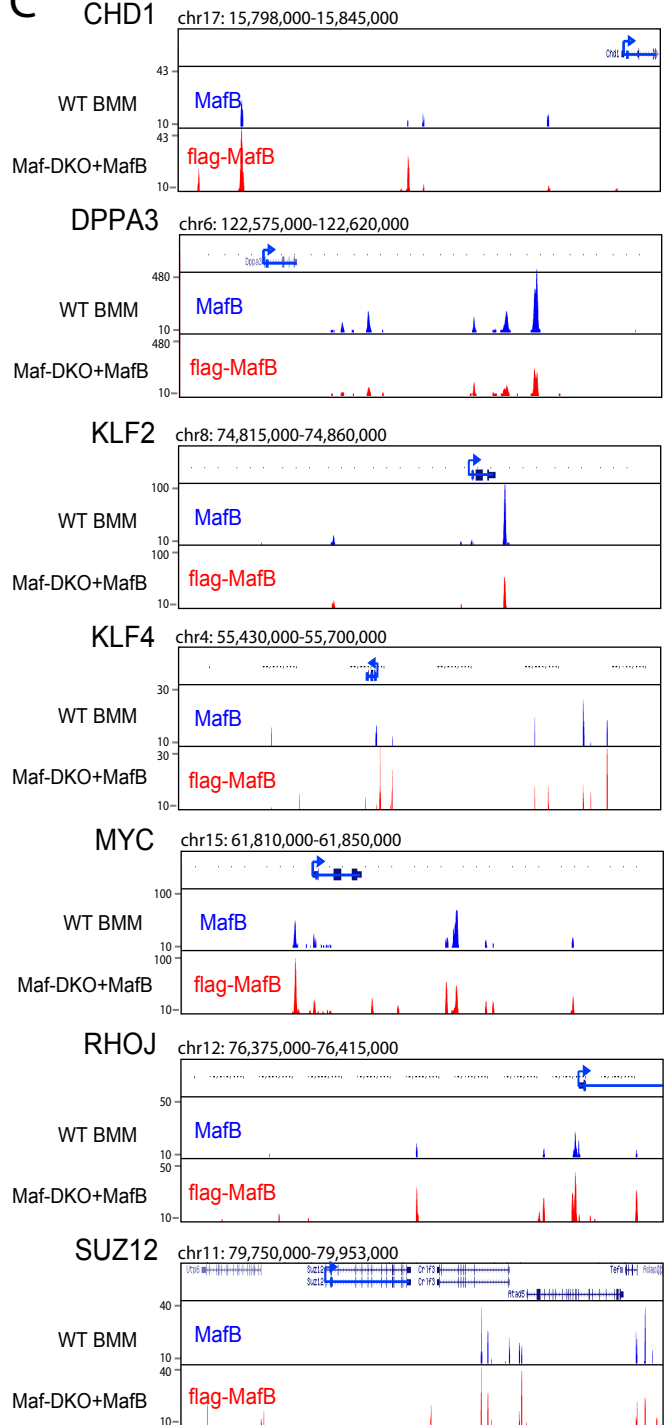

# Sup. Figure 10

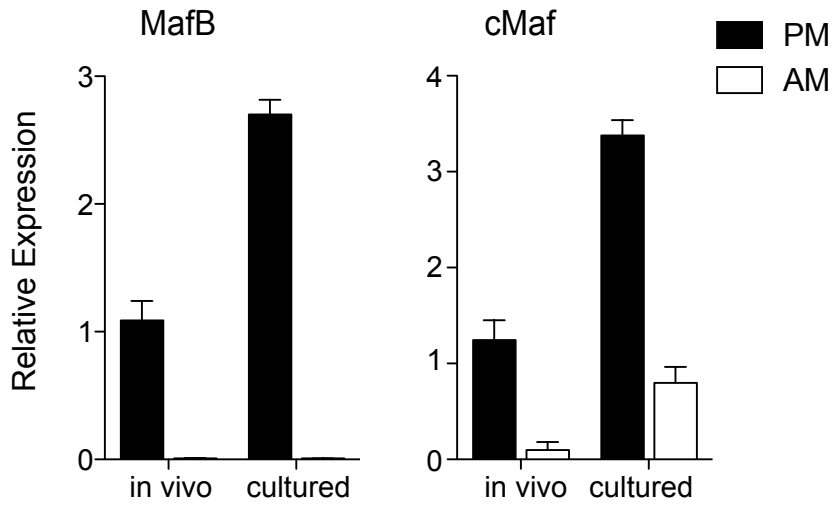

# Sup. Figure 11

A

F4/80 MafB Ki67 TO-PRO3

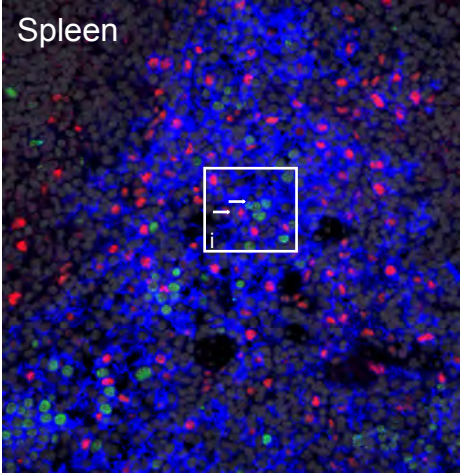

B

F4/80 MafB Ki67 TO-PRO3

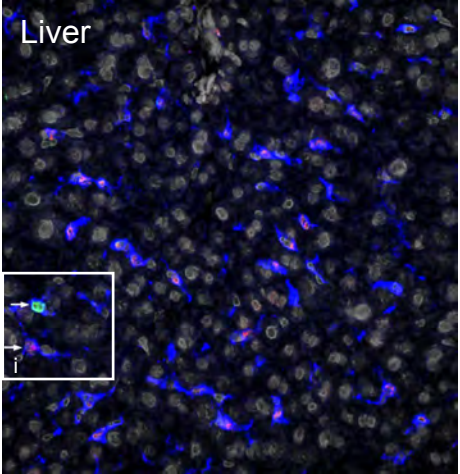

# Sup. Figure 12

A

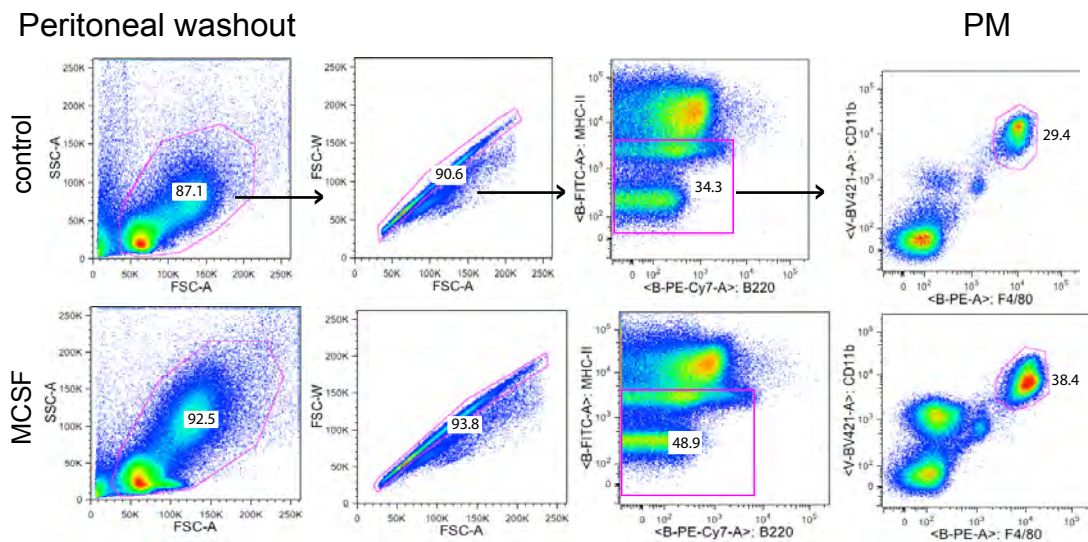

B

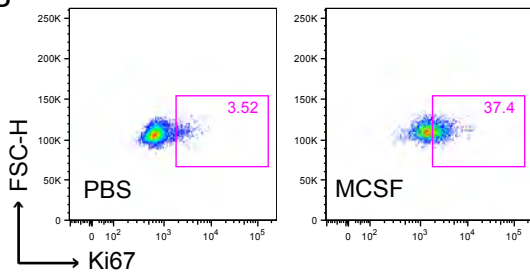

C

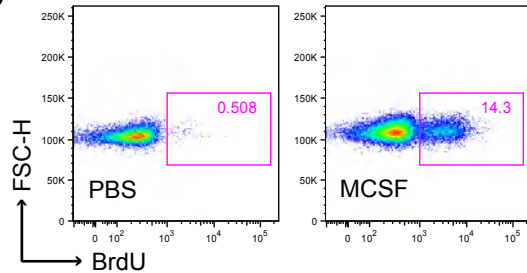

D

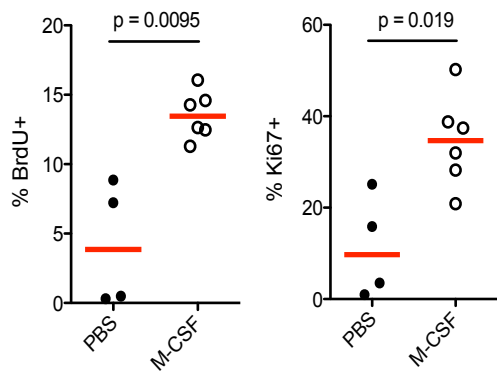

E

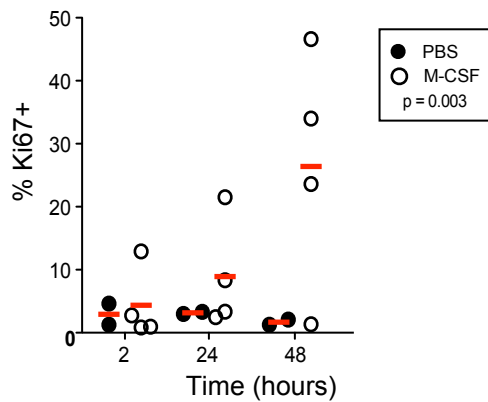

Sup. Figure 13

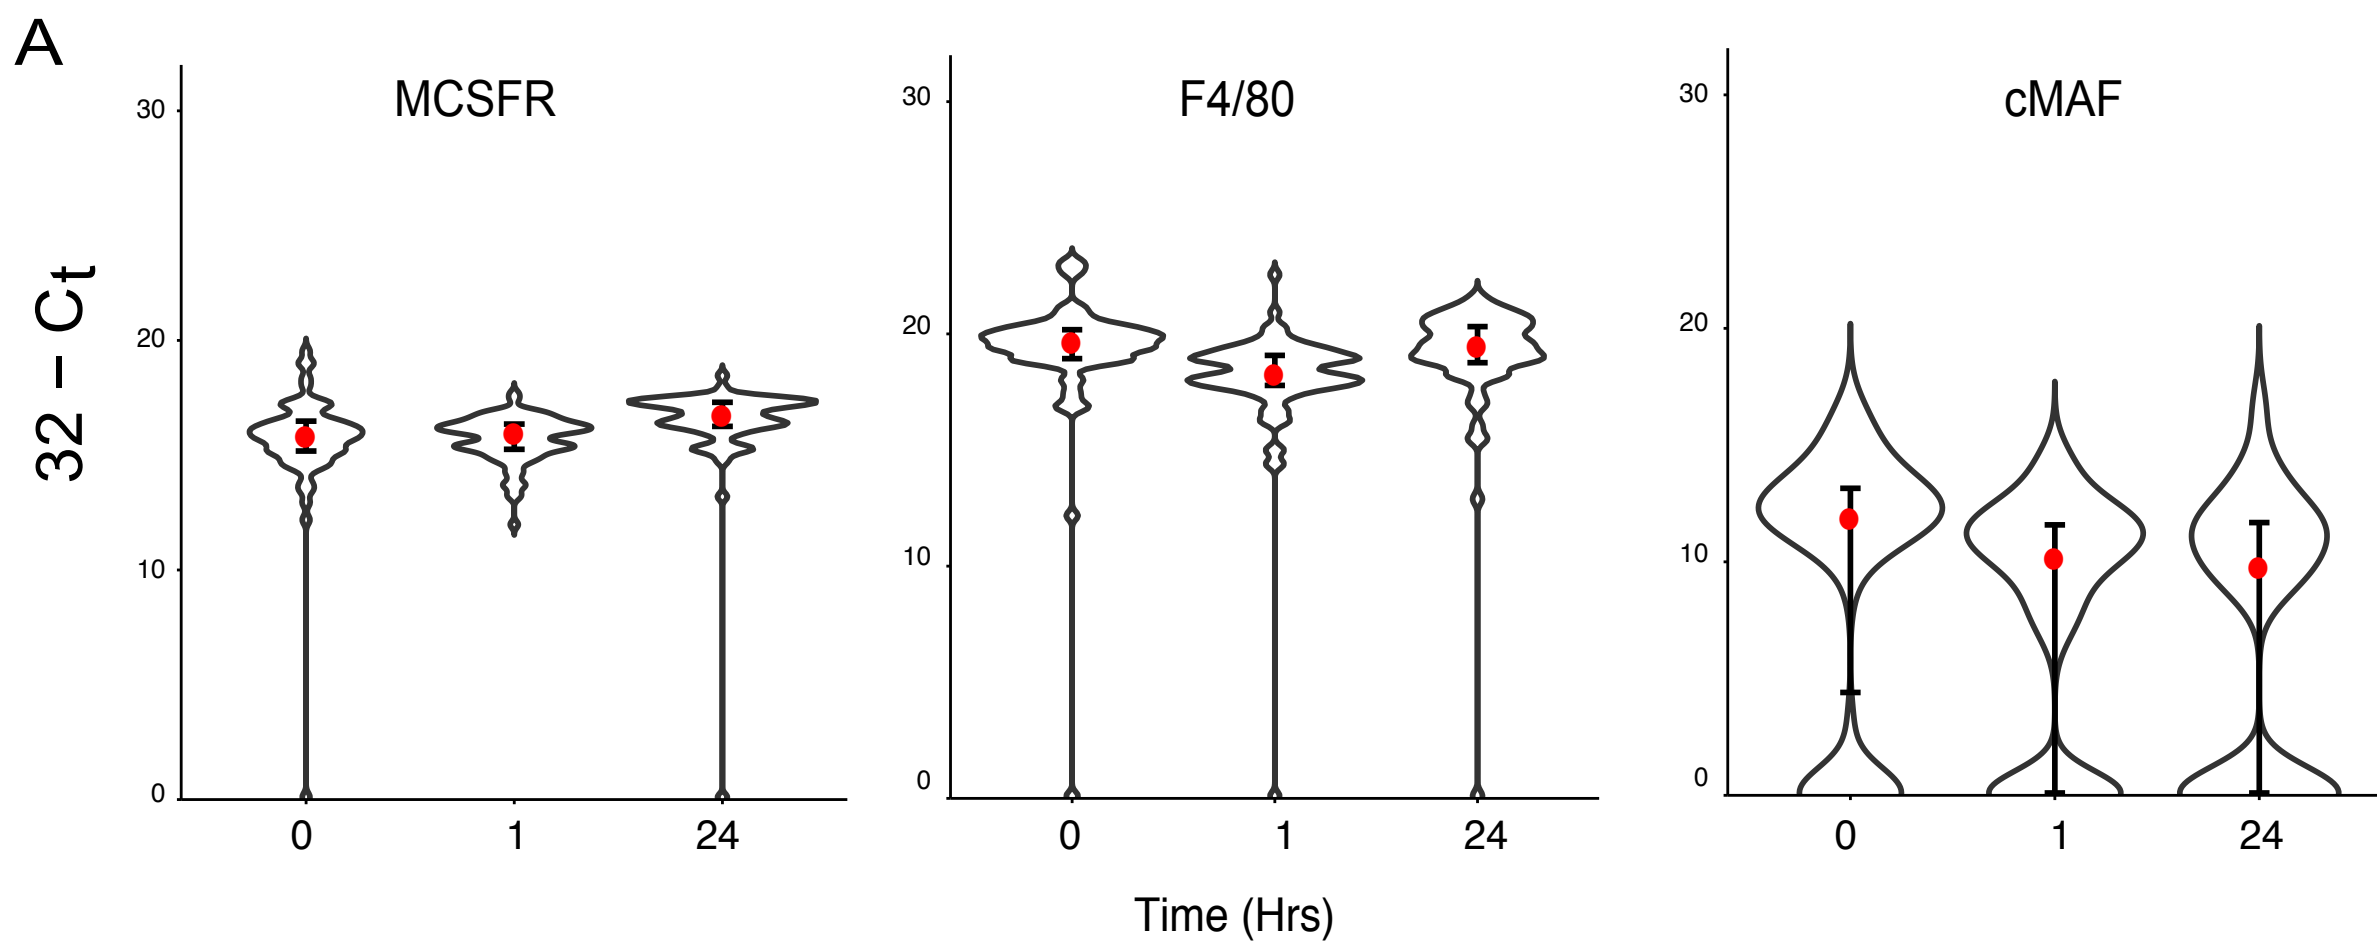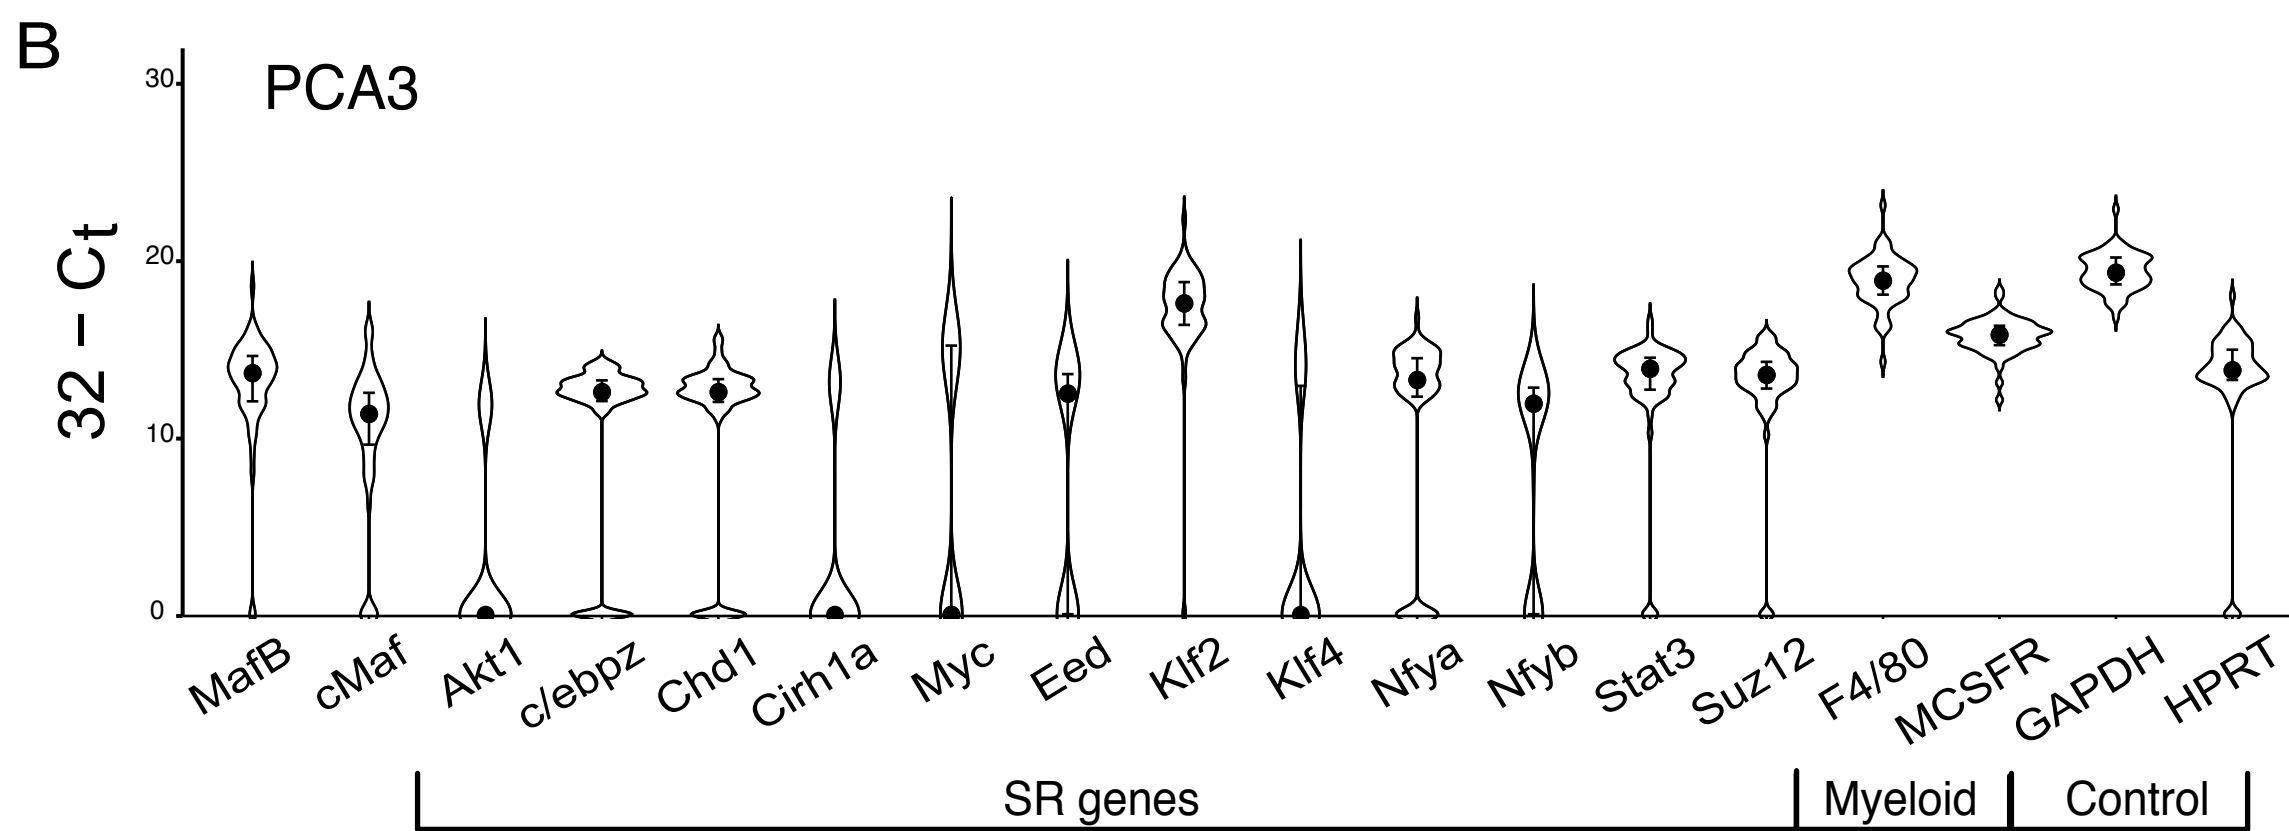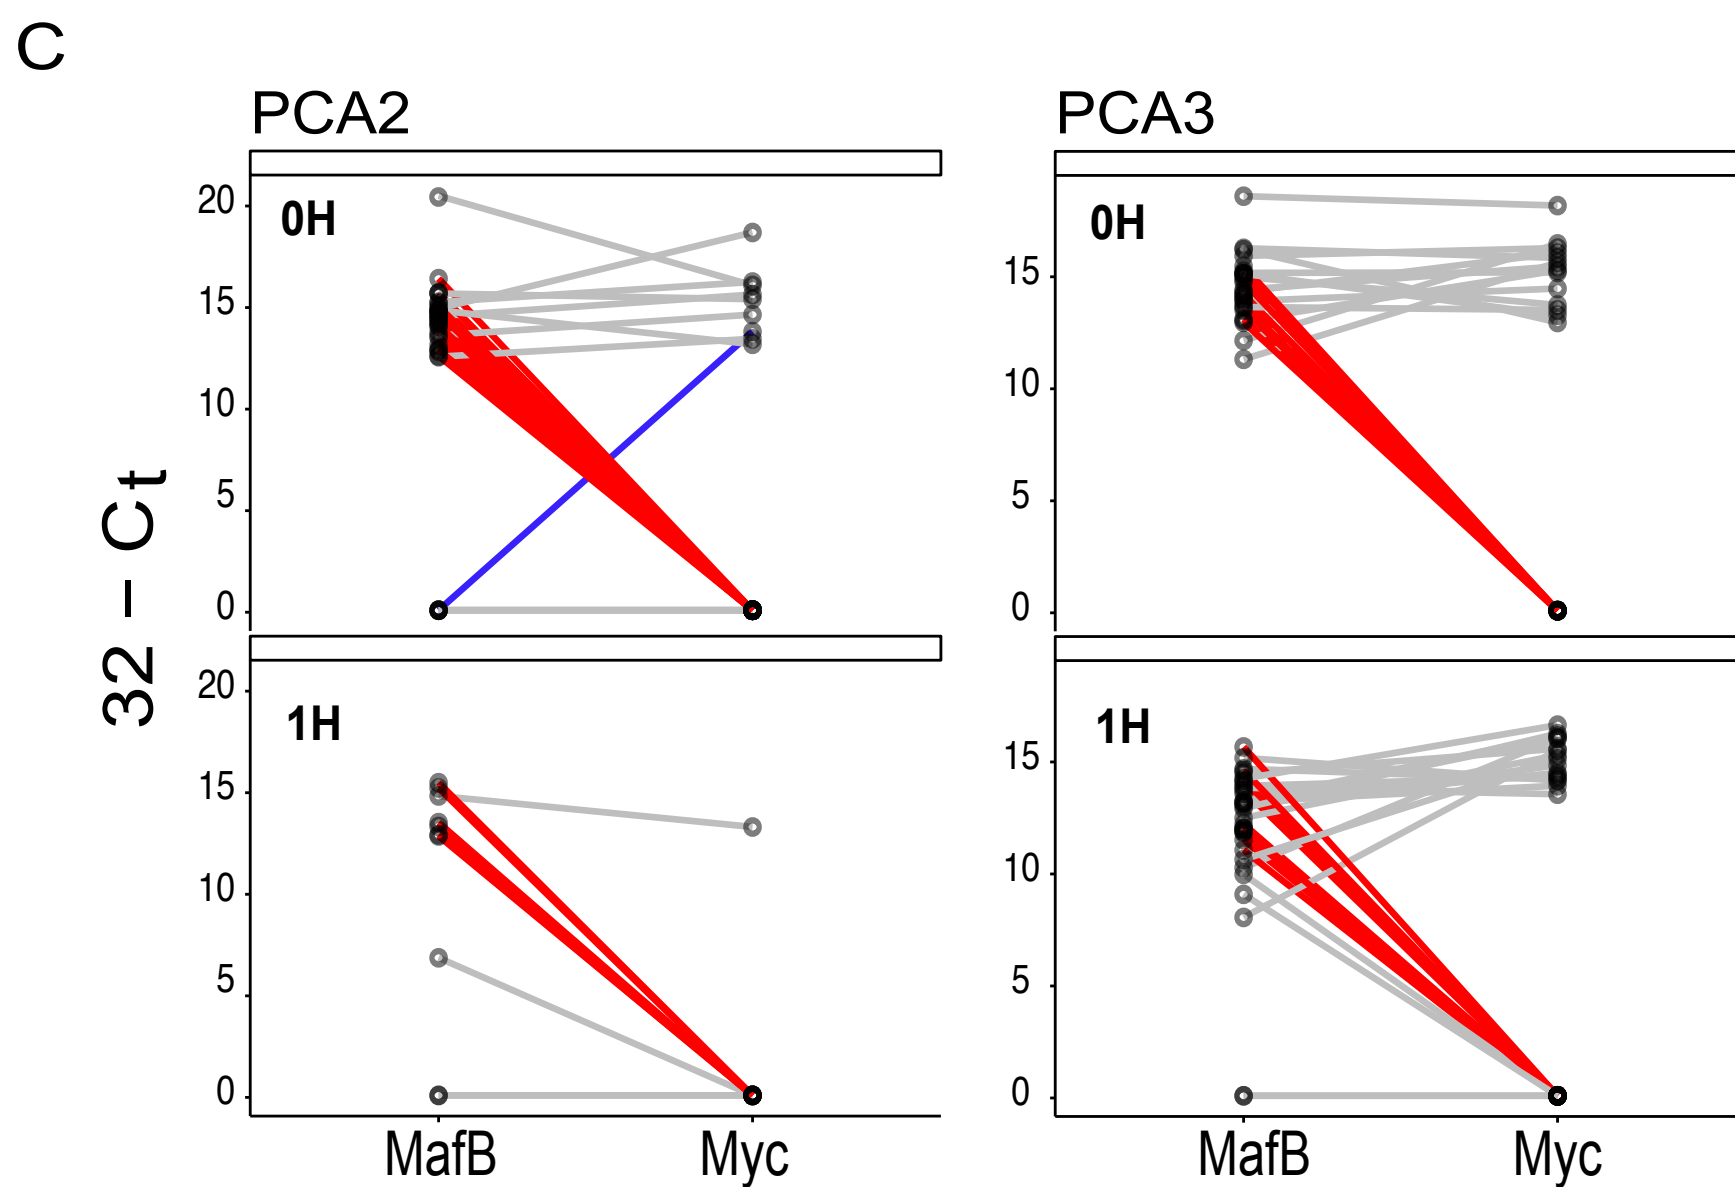

Supplement: NIHMS767240-supplement-Supplemental_Figures.pdf [file NIHMS767240-supplement-Supplemental_Figures.pdf]
